# Supplementary material for: An elevated platelet-to-lymphocyte ratio is associated with a higher risk of intracranial atherosclerotic stenosis
Source: PubMed Central journal article supplement — Chin Med J (Engl). 2022 Jul 22;135(12):1425–31. doi: 10.1097/CM9.0000000000002228 (PMC9481432; doi:10.1097/cm9.0000000000002228), 2022-07-22
Supplement: cm9-135-1425-s001.pdf [file cm9-135-1425-s001.pdf]

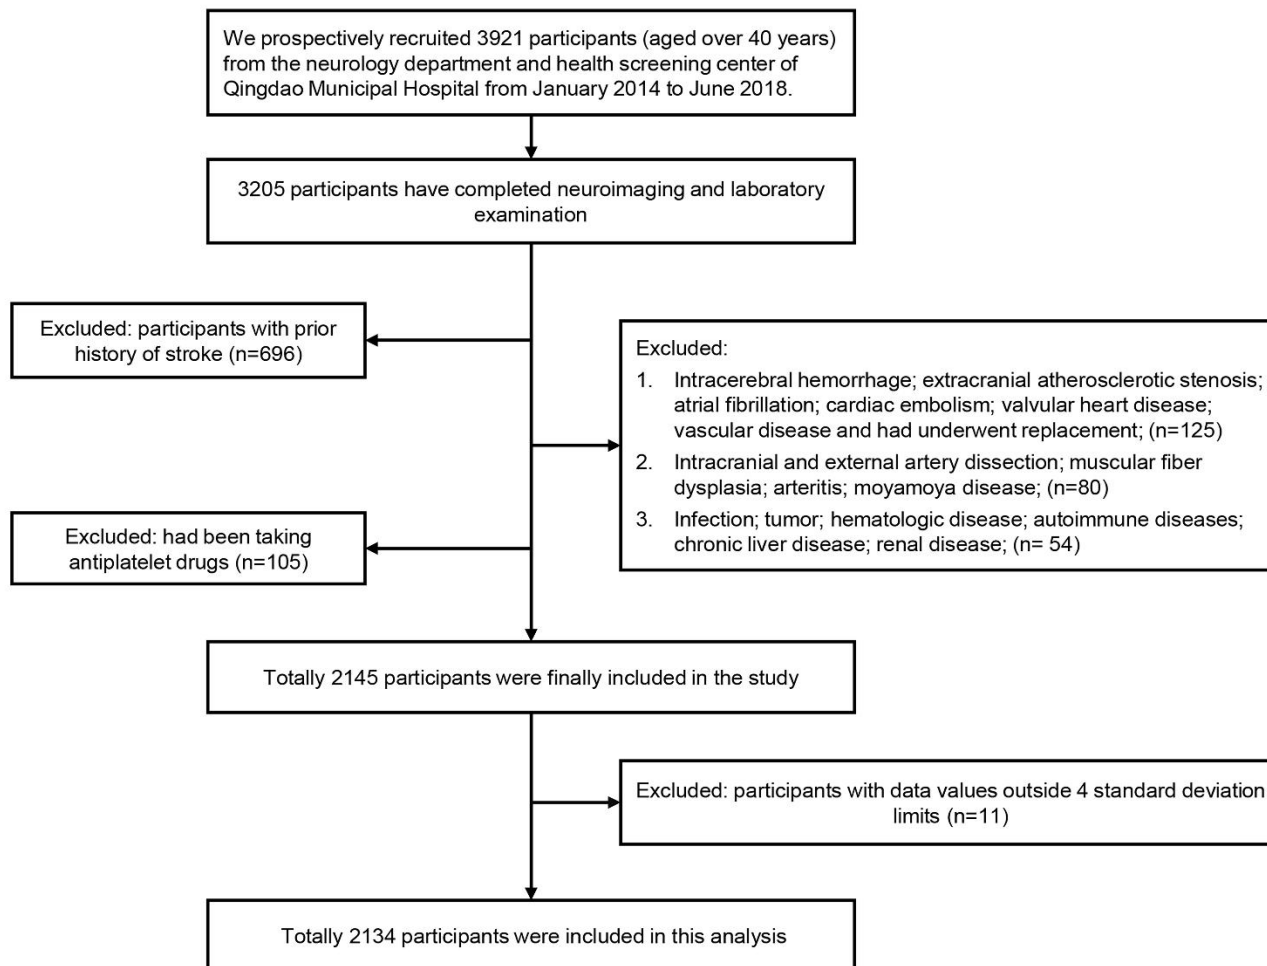

**Supplementary Figure 1:** Flowchart of the screening process about the included participants.

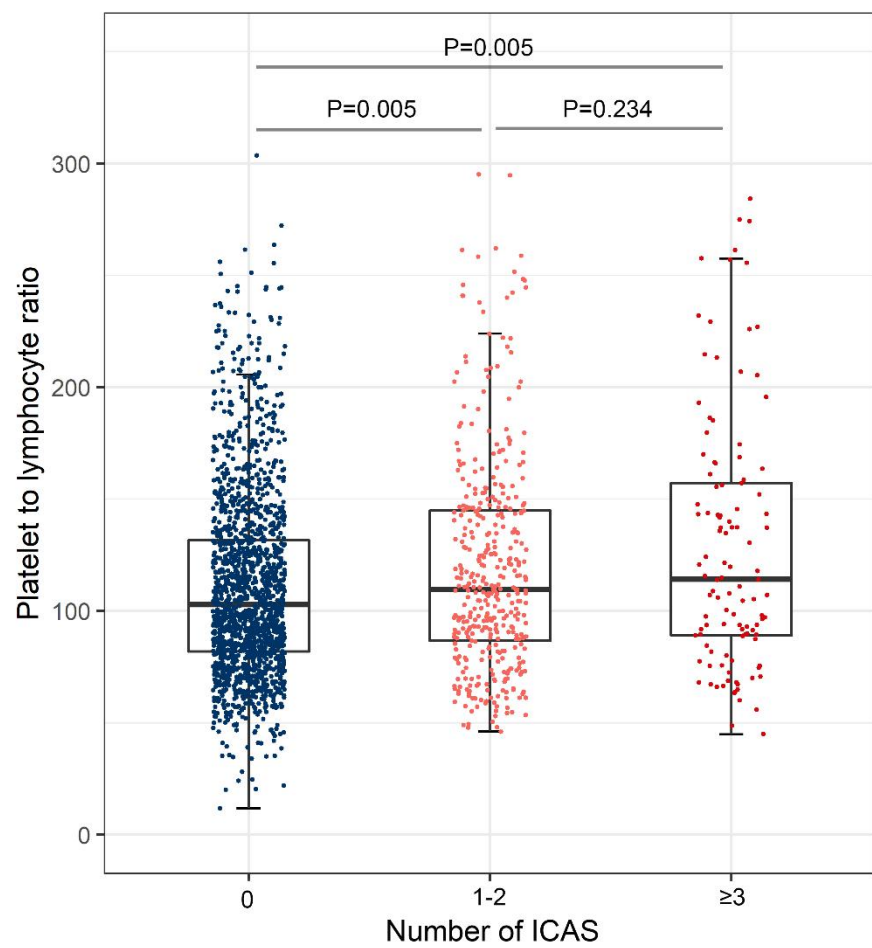

**Supplementary Figure 2:** Comparisons of PLR in different groups according to the number of ICAS. ICAS: Intracranial arterial stenosis; PLR: Platelet-to-lymphocyte ratio.

**Supplementary Table 1: Characteristics of participants in the department of neurology and the health screening center.**

|                             | Department of neurology ( <i>n</i> = 1782) | Health screening center ( <i>n</i> = 352) | Statistics          | <i>P</i> -value |
|-----------------------------|--------------------------------------------|-------------------------------------------|---------------------|-----------------|
| <b>Characteristics</b>      |                                            |                                           |                     |                 |
| ICAS, <i>n</i> (%)          | 474 (26.6)                                 | 44 (12.5)                                 | 31.789 <sup>†</sup> | <0.001          |
| Age, median (IQR), years    | 67 (59–78)                                 | 66 (61.25–72)                             | –2.216 <sup>*</sup> | 0.027           |
| Male, <i>n</i> (%)          | 1107 (62.1)                                | 171 (48.6)                                | 22.438 <sup>†</sup> | <0.001          |
| SBP, median (IQR), mmHg     | 149 (130–160)                              | 140 (130–150.75)                          | –4.882 <sup>*</sup> | <0.001          |
| DBP, median (IQR), mmHg     | 84 (80–90)                                 | 80 (79.25–90)                             | –2.892 <sup>*</sup> | 0.004           |
| Lipid profile, median (IQR) |                                            |                                           |                     |                 |

|                                                 |                       |                       |                      |        |
|-------------------------------------------------|-----------------------|-----------------------|----------------------|--------|
| TG (mmol/L)                                     | 1.32 (0.96–1.78)      | 1.25 (0.89–1.75)      | −2.072*              | 0.038  |
| TC (mmol/L)                                     | 4.97 (4.21–5.81)      | 4.84 (4.15–5.60)      | −2.075*              | 0.038  |
| HDL (mmol/L)                                    | 1.13 (0.96–1.34)      | 1.16 (1.00–1.39)      | −2.104*              | 0.035  |
| LDL (mmol/L)                                    | 3.05 (2.50–3.64)      | 2.94 (2.39–3.48)      | −2.116*              | 0.034  |
| FBG, median (IQR), mmol/L                       | 5.36 (4.70–6.86)      | 5.15 (4.60–6.37)      | −3.026*              | 0.002  |
| Platelet, median (IQR), (10 <sup>9</sup> /L)    | 206 (173–239)         | 204.5 (173–235)       | −0.440*              | 0.660  |
| Lymphocytes, median (IQR), (10 <sup>9</sup> /L) | 1.95 (1.56–2.42)      | 1.94 (1.51–2.40)      | −0.797*              | 0.425  |
| PLR, median (IQR)                               | 104.60 (82.19–135.64) | 105.87 (82.40–139.19) | −0.530*              | 0.596  |
| Medical history                                 |                       |                       |                      |        |
| Hypertension, <i>n</i> (%)                      | 1372 (77.0)           | 274 (77.8)            | 0.120 <sup>†</sup>   | 0.729  |
| Diabetes mellitus, <i>n</i> (%)                 | 631 (35.4)            | 120 (34.1)            | 0.224 <sup>†</sup>   | 0.636  |
| CHD, <i>n</i> (%)                               | 631 (35.4)            | 160 (45.5)            | 12.714 <sup>†</sup>  | <0.001 |
| Acute ischemic stroke, <i>n</i> (%)             | 1293 (72.6)           |                       | 648.085 <sup>†</sup> | <0.001 |

|                                    |            |           |                     |        |
|------------------------------------|------------|-----------|---------------------|--------|
| Smoking, <i>n</i> (%)              | 641 (36.0) | 87 (24.7) | 16.566 <sup>†</sup> | <0.001 |
| Drinking, <i>n</i> (%)             | 478 (26.8) | 48 (13.6) | 27.523 <sup>†</sup> | <0.001 |
| Lipid-lowering drugs, <i>n</i> (%) | 212 (11.9) | 35 (9.9)  | 1.096 <sup>†</sup>  | 0.295  |

\*Mann–Whitney *U* test.

<sup>†</sup>Chi-squared test.

CHD: Coronary heart disease; DBP: Diastolic blood pressure; FBG: Fasting blood glucose; HDL: High-density lipoprotein; ICAS: Intracranial arterial stenosis; LDL: Low-density lipoprotein; PLR: Platelet-to-lymphocyte ratio; SBP: Systolic blood pressure; TC: Total cholesterol; TG: Triglyceride.

**Supplementary Table 2: Characteristics of participants in subgroups stratified by an acute ischemic stroke.**

| Characteristics | Stroke group ( <i>n</i> = 1293) |                |                | Non-stroke group ( <i>n</i> = 841) |                |                |
|-----------------|---------------------------------|----------------|----------------|------------------------------------|----------------|----------------|
|                 | ICAS (362)                      | Non-ICAS (931) | <i>P</i> (sta) | ICAS (156)                         | Non-ICAS (685) | <i>P</i> (sta) |
| Age, median     | 69 (61–78)                      | 66 (59–76)     | <0.001         | 72 (64–81)                         | 67 (60–76)     | <0.001         |

|                                |                  |                  |                             |                  |                  |                             |
|--------------------------------|------------------|------------------|-----------------------------|------------------|------------------|-----------------------------|
| (IQR), years                   |                  |                  | (−3.578*)                   |                  |                  | (−4.461*)                   |
| Male, <i>n</i> (%)             | 226 (62.4)       | 619 (66.5)       | 0.169 (1.894 <sup>†</sup> ) | 80 (51.3)        | 353 (51.5)       | 0.955 (0.003 <sup>†</sup> ) |
| SBP, median<br>(IQR), mmHg     | 150 (138–170)    | 150 (131–160)    | 0.011 (−2.538*)             | 146.5 (130–160)  | 140 (130–150)    | 0.002 (−3.147*)             |
| DBP, median<br>(IQR), mmHg     | 85 (80–90)       | 85 (80–95)       | 0.804 (−0.248*)             | 82.50 (78.25–90) | 80 (78–90)       | 0.432 (−0.786*)             |
| Lipid profile,<br>median (IQR) |                  |                  |                             |                  |                  |                             |
| TG (mmol/L)                    | 1.27 (0.97–1.72) | 1.33 (0.98–1.84) | 0.457 (−0.743*)             | 1.39 (0.99–1.90) | 1.26 (0.89–1.73) | 0.103 (−1.632*)             |
| TC (mmol/L)                    | 5.06 (4.25–5.93) | 5.01 (4.27–5.87) | 0.843 (−0.198*)             | 4.77 (3.82–5.81) | 4.84 (4.16–5.57) | 0.396 (−0.849*)             |
| HDL (mmol/L)                   | 1.11 (0.94–1.30) | 1.14 (0.97–1.33) | 0.118 (−1.562*)             | 1.13 (0.92–1.35) | 1.15 (0.99–1.40) | 0.141 (−1.471*)             |
| LDL (mmol/L)                   | 3.13 (2.54–3.66) | 3.10 (2.58–3.71) | 0.823 (−0.223*)             | 2.90 (2.20–3.61) | 2.92 (2.40–3.47) | 0.632 (−0.478*)             |
| FBG, median<br>(IQR),          | 5.77 (4.86–8.13) | 5.36 (4.69–6.93) | <0.001<br>(−3.670*)         | 5.50 (4.74–7.22) | 5.12 (4.63–6.05) | 0.003 (−3.019*)             |

|                                                       |                          |                          |                             |                          |                          |                             |
|-------------------------------------------------------|--------------------------|--------------------------|-----------------------------|--------------------------|--------------------------|-----------------------------|
| mmol/L                                                |                          |                          |                             |                          |                          |                             |
| Platelet,<br>median (IQR),<br>(10 <sup>9</sup> /L)    | 207 (172–241.25)         | 205 (173–241)            | 0.876 (–0.156*)             | 205 (175.50–249)         | 204 (172–234)            | 0.498 (–0.677*)             |
| Lymphocytes,<br>median (IQR),<br>(10 <sup>9</sup> /L) | 1.87 (1.48–2.33)         | 2.02 (1.61–2.47)         | 0.001 (–3.295*)             | 1.85 (1.37–2.35)         | 1.96 (1.55–2.42)         | 0.035 (–2.105*)             |
| PLR, median<br>(IQR)                                  | 109.06<br>(84.68–145.78) | 101.30<br>(81.28–130.56) | 0.005 (–2.838*)             | 114.18<br>(89.25–146.48) | 103.62<br>(82.30–134.57) | 0.017 (–2.382*)             |
| Medical<br>history                                    |                          |                          |                             |                          |                          |                             |
| Hypertension<br>, <i>n</i> (%)                        | 295 (81.5)               | 696 (74.8)               | 0.010 (6.602 <sup>†</sup> ) | 129 (82.7)               | 526 (76.8)               | 0.109 (2.571 <sup>†</sup> ) |
| Diabetes<br>mellitus, <i>n</i>                        | 155 (42.8)               | 313 (33.6)               | 0.002 (9.549 <sup>†</sup> ) | 69 (44.2)                | 214 (31.2)               | 0.002 (9.603 <sup>†</sup> ) |

|                       |            |            |                             |           |            |                             |
|-----------------------|------------|------------|-----------------------------|-----------|------------|-----------------------------|
| (%)                   |            |            |                             |           |            |                             |
| CHD, <i>n</i> (%)     | 134 (37.0) | 264 (28.4) | 0.002 (9.175 <sup>†</sup> ) | 74 (47.4) | 319 (46.6) | 0.845 (0.038 <sup>†</sup> ) |
| Smoking, <i>n</i>     |            |            |                             |           |            |                             |
| (%)                   | 128 (35.4) | 381 (40.9) | 0.066 (3.381 <sup>†</sup> ) | 46 (29.5) | 173 (25.3) | 0.277 (1.181 <sup>†</sup> ) |
| Drinking, <i>n</i>    |            |            |                             |           |            |                             |
| (%)                   | 94 (26.0)  | 278 (29.9) | 0.165 (1.928 <sup>†</sup> ) | 33 (21.2) | 121 (17.7) | 0.309 (1.034 <sup>†</sup> ) |
| Lipid-lowerin         |            |            | <0.001                      |           |            | <0.001                      |
| g drugs, <i>n</i> (%) | 67 (18.5)  | 83 (8.9)   | (23.391 <sup>†</sup> )      | 40 (25.6) | 57 (8.3)   | (37.356 <sup>†</sup> )      |

\*Mann–Whitney *U* test.

<sup>†</sup>Chi-squared test.

CHD: Coronary heart disease; DBP: Diastolic blood pressure; FBG: Fasting blood glucose; HDL: High-density lipoprotein; ICAS: Intracranial arterial stenosis; LDL: Low-density lipoprotein; PLR: Platelet-to-lymphocyte ratio; SBP: Systolic blood pressure; sta: Statistics; TC: Total cholesterol; TG: Triglyceride.

**Supplementary Table 3: Multivariate logistic regression analysis in subjects from two different clinical departments.**



| Characteristics           | Department of neurology |                 | Health screening center |                 |
|---------------------------|-------------------------|-----------------|-------------------------|-----------------|
|                           | OR (95% CI)             | <i>P</i> -value | OR (95% CI)             | <i>P</i> -value |
| Continuous                | 1.005 (1.002–1.007)     | <0.001          | 1.008 (1.000–1.015)     | 0.039           |
| Q1                        | ref                     |                 | Ref                     |                 |
| Q2                        | 0.971 (0.707–1.335)     | 0.857           | 1.172 (0.397–3.455)     | 0.774           |
| Q3                        | 1.115 (0.816–1.524)     | 0.494           | 1.304 (0.446–3.817)     | 0.628           |
| Q4                        | 1.642 (1.210–2.228)     | 0.001           | 3.071 (1.147–8.225)     | 0.026           |
| <i>P</i> -value for trend | 1.006 (1.003–1.009)     | <0.001          | 1.012 (1.003–1.022)     | 1.010           |

Adjusted for age, SBP, FBG, HDL, acute ischemic stroke, diabetes mellitus, hypertension, and lipid-lowering drugs.

CI: Confidence interval; FBG: Fasting blood glucose; HDL: High-density lipoprotein; OR: Odds ratio; Q: Quartile; SBP: Systolic blood pressure.

**Supplementary Table 4: Multivariate logistic regression analysis in participants who completed CRP test.**

| Characteristics | OR (95% CI) | <i>P</i> -value |
|-----------------|-------------|-----------------|
|-----------------|-------------|-----------------|

---

|                           |                     |        |
|---------------------------|---------------------|--------|
| Continuous                | 1.006 (1.002–1.009) | 0.001  |
| Q1                        | ref                 |        |
| Q2                        | 1.127 (0.720–1.766) | 0.601  |
| Q3                        | 1.084 (0.685–1.716) | 0.732  |
| Q4                        | 2.012 (1.295–3.125) | 0.002  |
| <i>P</i> -value for trend | 1.007 (1.003–1.011) | <0.001 |

---

A total of 985 participants who completed the CRP test were included in this analysis.

Adjusted for age, SBP, FBG, HDL, acute ischemic stroke, diabetes mellitus, hypertension, lipid-lowering drugs, and CRP.

CI: Confidence interval; CRP: C-reactive protein; HDL: High-density lipoprotein; FBG: Fasting blood glucose; OR: Odds ratio; Q: Quartile; SBP: Systolic blood pressure.

**Supplementary Table 5: Multivariable analysis of risk factors associated with ICAS in stroke and non-stroke groups.**

| Characteristics | Non-stroke group ( <i>n</i> = 841) |                 | Stroke group ( <i>n</i> = 1293) |                 |
|-----------------|------------------------------------|-----------------|---------------------------------|-----------------|
|                 | Multi-OR (95% CI)                  | <i>P</i> -value | Multi-OR (95% CI)               | <i>P</i> -value |
| Age             | 1.029 (1.011–1.047)                | 0.002           | 1.016 (1.005–1.028)             | 0.004           |
| Male            | –                                  | –               | –                               | –               |
| SBP             | 1.012 (1.003–1.022)                | 0.013           | 1.003 (0.998–1.009)             | 0.249           |
| DBP             | –                                  | –               | –                               | –               |
| FBG, mmol/L     | 1.123 (1.025–1.231)                | 0.012           | 1.053 (0.995–1.115)             | 0.074           |
| TG, mmol/L      | –                                  | –               | –                               | –               |
| TC, mmol/L      | –                                  | –               | –                               | –               |
| HDL, mmol/L     | 0.620 (0.347–1.016)                | 0.084           | 0.642 (0.426–0.920)             | 0.024           |
| LDL, mmol/L     | –                                  | –               | –                               | –               |

|                      |                     |        |                     |        |
|----------------------|---------------------|--------|---------------------|--------|
| Hypertension         | 0.973 (0.597–1.621) | 0.913  | 1.311 (0.945–1.835) | 0.109  |
| Diabetes             | 0.960 (0.593–1.530) | 0.866  | 1.207 (0.866–1.678) | 0.264  |
| CHD                  | –                   | –      | –                   | –      |
| Smoking              | –                   | –      | –                   | –      |
| Drinking             | –                   | –      | –                   | –      |
| Lipid-lowering drugs | 3.007 (1.818–4.954) | <0.001 | 1.890 (1.309–2.721) | <0.001 |
| PLR                  | 1.005 (1.001–1.009) | 0.027  | 1.005 (1.002–1.008) | <0.001 |

Adjusted for age, SBP, FBG, HDL, diabetes mellitus, hypertension, and lipid-lowering drugs.

CHD: Coronary heart disease; CI: Confidence interval; DBP: Diastolic blood pressure; FBG: Fasting blood glucose; HDL: High-density lipoprotein; LDL: Low-density lipoprotein; Multi-OR: Multivariate OR; OR: Odds ratio; PLR: Platelet-to-lymphocyte ratio; SBP: Systolic blood pressure; TC: Total cholesterol; TG: Triglyceride.
